# Supplementary material
Source: PubMed Central journal article supplement (PMC7281820)
Supplement: NIHMS1067574-supplement-Appendix.pdf [file NIHMS1067574-supplement-Appendix.pdf]

Appendix – ICD-9-CM Codes for Study Indices

Severe maternal morbidity (SMM)

| Condition/Procedure                              | ICD-9-CM Codes                                                            |
|--------------------------------------------------|---------------------------------------------------------------------------|
| Acute myocardial infarction                      | 410.xx                                                                    |
| Acute renal failure                              | 584.x, 669.3x                                                             |
| Adult respiratory distress syndrome              | 581.5, 518.81, 518.82, 518.84, 799.1                                      |
| Amniotic fluid embolism                          | 673.1x                                                                    |
| Aneurysm                                         | 441.xx                                                                    |
| Cardiac arrest/ventricular fibrillation          | 427.41, 427.42, 427.5                                                     |
| Disseminated intravascular coagulation           | 286.6, 286.9, 666.3x                                                      |
| Eclampsia                                        | 642.6x                                                                    |
| Heart failure during procedure or surgery        | 669.4x, 997.1                                                             |
| Internal injuries of thorax, abdomen, and pelvis | 860.xx—869.xx                                                             |
| Intracranial injuries                            | 800.xx, 801.xx, 803.xx, 804.xx, 851.xx—854.xx                             |
| Puerperal cerebrovascular disorders              | 430, 431, 432.x, 433.xx, 434.xx, 436, 437.x, 671.5x, 674.0x, 997.2, 999.2 |
| Pulmonary edema                                  | 428.1, 518.4                                                              |
| Severe anesthesia complications                  | 668.0x, 668.1x, 668.2x                                                    |
| Sepsis                                           | 038.xx, 995.91, 995.92                                                    |
| Shock                                            | 669.1x, 785.5x, 995.0, 995.4, 998.0                                       |
| Sickle cell anemia with crisis                   | 282.62, 282.64, 282.69                                                    |
| Thrombotic embolism                              | 415.1x, 673.0x, 673.2x, 673.3x, 673.8x                                    |
| Blood transfusion*                               | 99.0x                                                                     |
| Cardio monitoring                                | 89.6x                                                                     |
| Conversion of cardiac rhythm                     | 99.6x                                                                     |

|                                         |                            |
|-----------------------------------------|----------------------------|
| Hysterectomy                            | 68.3x—68.9                 |
| Operations of the heart and pericardium | 35.xx, 36.xx, 37.xx, 39.xx |
| Temporary tracheostomy                  | 31.1                       |
| Ventilation                             | 93.90, 96.01—96.05, 96.7x  |

\* Excluded from the algorithm in this study

#### Obstetric comorbidity index (OCI)

| Condition/Age                    | ICD9-CM Codes                                                        | Score |
|----------------------------------|----------------------------------------------------------------------|-------|
| Severe preeclampsia/eclampsia ‡  | 642.5x                                                               | 5     |
| Chronic congestive heart failure | 428.22, 428.23, 428.32, 428.33, 428.42, 428.43                       | 5     |
| Congenital heart disease         | 745.0x—747.4x, 648.5x                                                | 4     |
| Pulmonary hypertension           | 416.0x, 416.8x, 416.9x                                               | 4     |
| Chronic ischemic heart disease   | 412.x—414.x                                                          | 3     |
| Sickle cell disease†             | 282.4x                                                               | 3     |
| Multiple gestation               | V27.2—V27.8, 651.x                                                   | 2     |
| Cardiac valvular disease         | 394.x—397.x, 424.x                                                   | 2     |
| Systemic lupus erythematosus     | 710.0x                                                               | 2     |
| HIV                              | 042.x, V08.x                                                         | 2     |
| Mild or unspecified preeclampsia | 642.2x, 642.7x (without severe preeclampsia/eclampsia)               | 2     |
| Drug abuse                       | 304.x, 305.2x—305.9x, 648.3x                                         | 2     |
| Placenta previa                  | 641.0x, 641.1x                                                       | 2     |
| Chronic renal disease            | 581.x—583.x, 585.x, 587.x, 588.x, 646.2x                             | 1     |
| Pre-existing hypertension        | 401.x—405.x, 642.0x—642.2x, 642.7x                                   | 1     |
| Previous cesarean delivery       | 654.2x                                                               | 1     |
| Gestational hypertension         | 642.3x (without preeclampsia/eclampsia or pre-existing hypertension) | 1     |

|                                |                        |   |
|--------------------------------|------------------------|---|
| Alcohol abuse                  | 291.xx, 303.xx, 305.0x | 1 |
| Asthma                         | 493.x                  | 1 |
| Pre-existing diabetes mellitus | 250.x, 648.0x          | 1 |
| Maternal age (yrs)             |                        |   |
| >44                            | N/A                    | 3 |
| 40–44                          | N/A                    | 2 |
| 35–39                          | N/A                    | 1 |

‡ 642.6x codes excluded due to overlap with definition of SMM

† 282.6x codes excluded due to overlap with definition of SMM
